# Supplementary material
Source: Springer Nature journal article supplement (https://www.springermedizin.de/resource/supplementary/12943_2006_164_MOESM1_ESM.pdf/9553582)

**DAY 0**

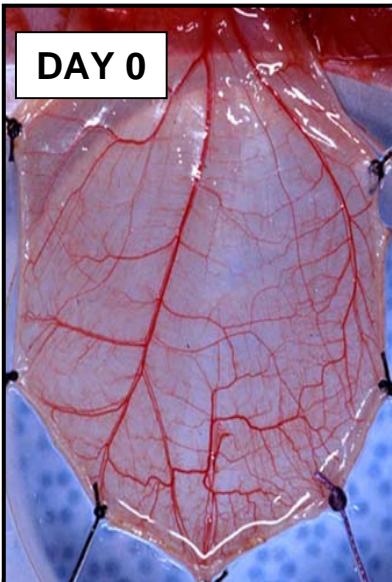

**DAY 10**

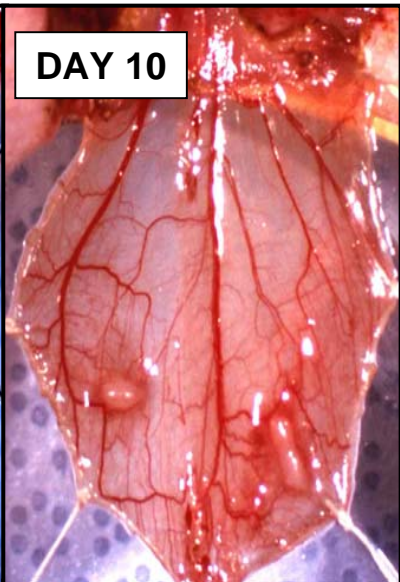

**DAY 20**

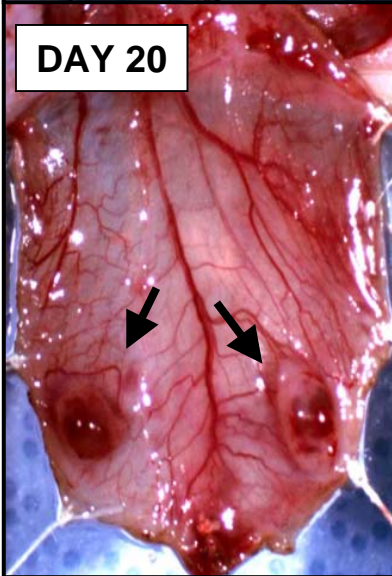

**DAY 30**

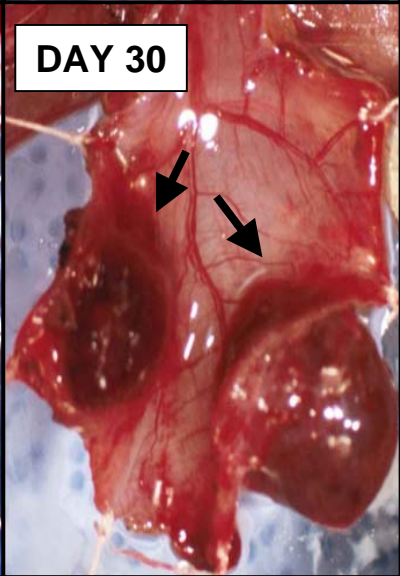

Supplement: MOESM1 [file 9553582]
